# Supplementary material for: Surface ozone over High-Mountain Asia controlled by stratospheric intrusion
Source: Copernicus journal article supplement (doi:10.5194/acp-2022-718), 2022-11-01
Supplement: Supplementary file 1 [file acp-2022-718-supplement.pdf]

# Supplementary of

## Surface ozone over High-Mountain Asia controlled by stratospheric intrusion

Xiufeng Yin <sup>1,2</sup>, Dipesh Rupakheti <sup>3</sup>, Guoshuai Zhang <sup>4</sup>, Jiali Luo <sup>5</sup>, Shichang Kang <sup>1,6</sup>, Benjamin de Foy <sup>7</sup>,  
Junhua Yang <sup>1</sup>, Zhenming Ji <sup>8</sup>, Zhiyuan Cong <sup>2,9</sup>, Maheswar Rupakheti <sup>10</sup>, Ping Li <sup>11</sup>, Qianggong Zhang <sup>2,9,\*</sup>

<sup>1</sup> State Key Laboratory of Cryospheric Science, Northwest Institute of Eco-Environment and Resources, Chinese Academy of Science, Lanzhou 730000, China

<sup>2</sup> Key Laboratory of Tibetan Environment Changes and Land Surface Processes, Institute of Tibetan Plateau Research, Chinese Academy of Sciences, Beijing 100101, China

<sup>3</sup> Jiangsu Key Laboratory of Atmospheric Environment Monitoring and Pollution Control, Collaborative Innovation Center of Atmospheric Environment and Equipment Technology, School of Environmental Science and Engineering, Nanjing University of Information Science and Technology, Nanjing 210044, China

<sup>4</sup> Chinese Academy of Environmental Planning, Beijing 100012, China

<sup>5</sup> Key Laboratory for Semi-Arid Climate Change of the Ministry of Education, College of Atmospheric Sciences, Lanzhou University, Lanzhou 730000, China

<sup>6</sup> University of Chinese Academy of Sciences, Beijing 100049, China

<sup>7</sup> Department of Earth and Atmospheric Sciences, Saint Louis University, St. Louis, MO, 63108, USA

<sup>8</sup> School of Atmospheric Sciences, Key Laboratory for Climate Change and Natural Disaster Studies of Guangdong Province, Sun Yat-sen University, Guangzhou 510275, China

<sup>9</sup> State Key Laboratory of Tibetan Plateau Earth System Science, Institute of Tibet Plateau Research, Chinese Academy of Sciences, Beijing 100101, China;

<sup>10</sup> Institute for Advanced Sustainability Studies, Potsdam, Germany

<sup>11</sup> Key Laboratory of Land Surface Process and Climate Change in Cold and Arid Regions, Northwest Institute of Eco-Environment and Resources, Chinese Academy of Science, Lanzhou 730000, China

\*Correspondence to: Qianggong Zhang ([qianggong.zhang@itpcas.ac.cn](mailto:qianggong.zhang@itpcas.ac.cn))

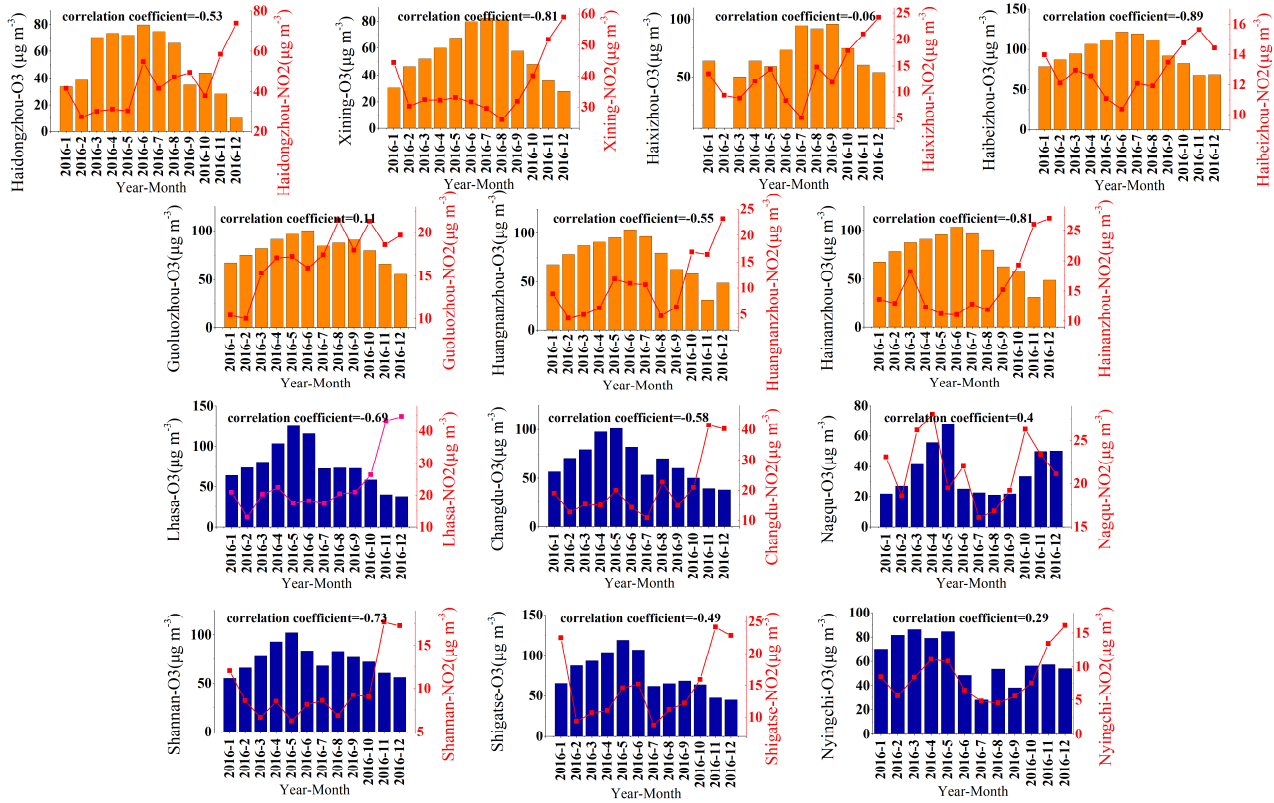

33

34

35

36

37

38

39

40

41

42

43

44

45

46

47

48

49

50

**Figure S1. Monthly mean concentrations of O<sub>3</sub> and NO<sub>2</sub> at thirteen sites in High-Mountain Asia. The correlation coefficient between O<sub>3</sub> and NO<sub>2</sub> concentrations at each site is also shown in the figure. Sites with ozone peaked in May colored in blue, in June and July colored in orange.**

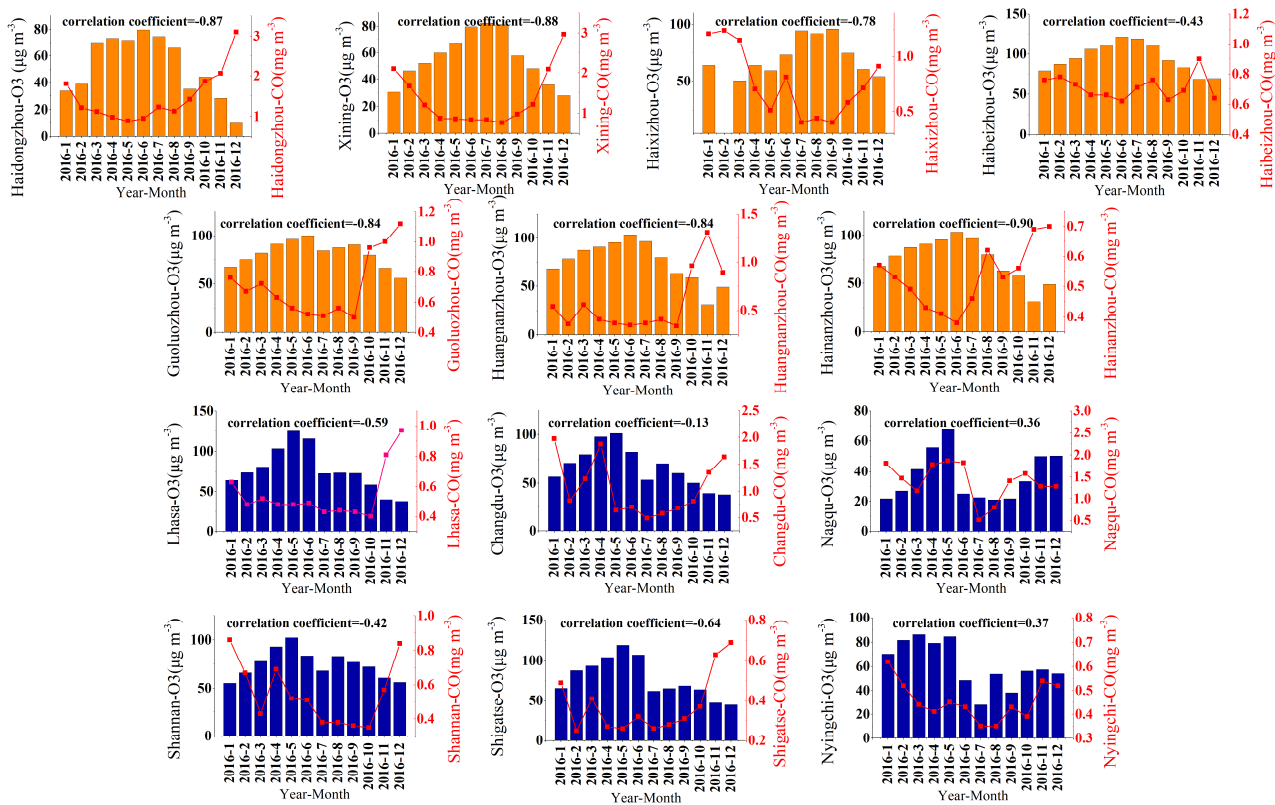

**Figure S2. Monthly mean concentrations of O<sub>3</sub> and CO at thirteen sites in High-Mountain Asia. The correlation coefficient between O<sub>3</sub> and CO concentrations at each site is also shown in the figure. Sites with ozone peaked in May colored in blue, in June and July colored in orange.**

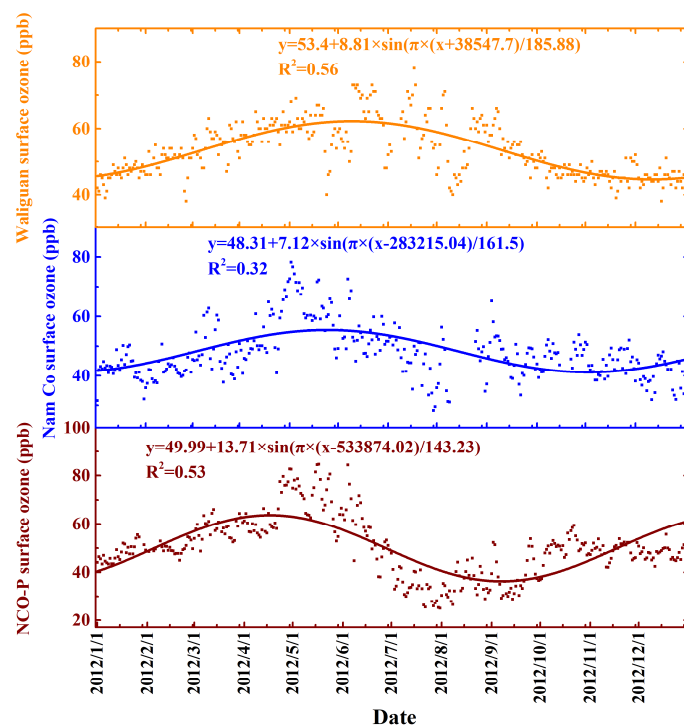

**Figure S3. Annual variation of surface ozone at three background sites in High-Mountain Asia (Waliguan: Xu et al. (2020); Nam Co: Yin et al. (2017); NCO-P: The Institute of Atmospheric Sciences and Climate, <https://www.isac.cnr.it/en>) in 2012 and their sinusoidal curve fits.**

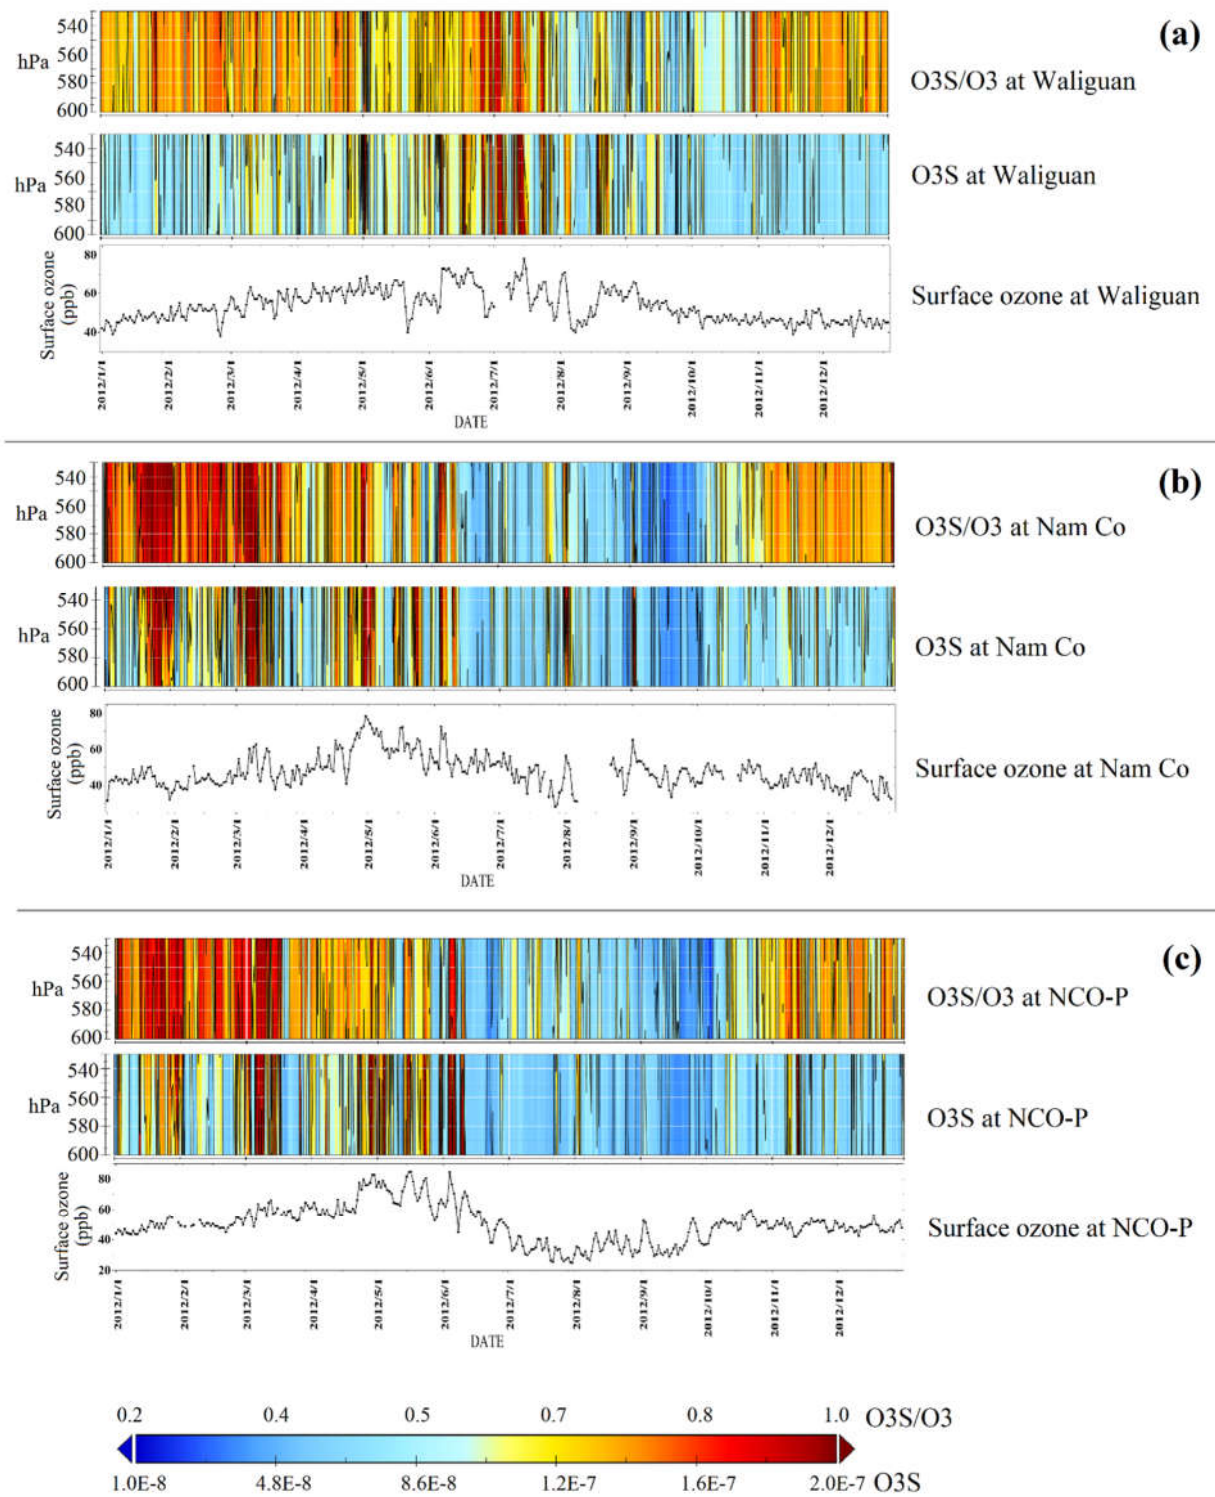

**Figure S4. Contour plots of daily mean O3S and O3S/O3 between 530 hPa and 600 hPa along with daily mean concentration of surface ozone at Waliguan, Nam Co, and NCO-P in High-Mountain Asia in 2012**

98

99

100

101

102

103

104

105

106

107

108

109

110

111

112

113

114

115

116

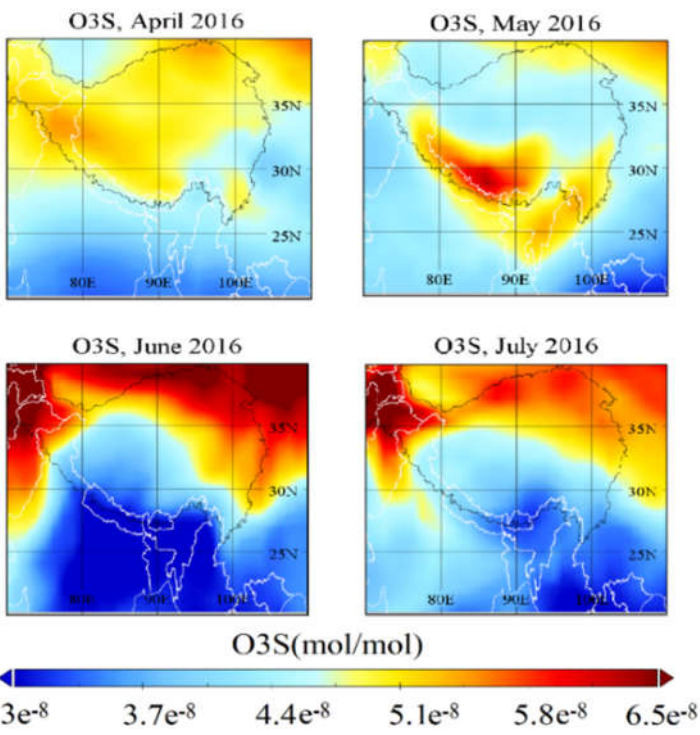

**Figure S5. The monthly mean O<sub>3s</sub> at 543.75 hPa in April, May, June and July in 2016 simulated with the Community Atmosphere Model with Chemistry (CAM-chem).**

117  
118  
  
  
119  
120  
121  
122  
123  
124  
125  
126  
127  
128  
129  
130  
131  
132  
133  
134  
135  
136

**Table S1. Longitude and latitude of the sites in High-Mountain Asia in this study**

|    | City         | Latitude(N°) | Longitude (E°) | Type   |
|----|--------------|--------------|----------------|--------|
| 1  | Haixizhou    | 37.3753      | 97.3731        | Urban  |
| 2  | Haibeizhou   | 36.9639      | 100.9048       | Urban  |
| 3  | Xining       | 36.63855     | 101.7828       | Urban  |
| 4  | Haidongzhou  | 36.5067      | 102.0306       | Urban  |
| 5  | Hainanzhou   | 36.2866      | 100.6188       | Urban  |
| 6  | Waliguan     | 36.283       | 100.9          | Remote |
| 7  | Huangnanzhou | 35.5102      | 102.0199       | Urban  |
| 8  | Guoluo Zhou  | 34.4714      | 100.2561       | Urban  |
| 9  | Nagqu        | 31.48215     | 92.05815       | Urban  |
| 10 | Changdu      | 31.1266      | 97.18065       | Urban  |
| 11 | Nam Co       | 30.77        | 90.99          | Remote |
| 12 | Lhasa        | 29.652       | 91.097         | Urban  |
| 13 | Nyingchi     | 29.6504      | 94.36485       | Urban  |
| 14 | Shigatse     | 29.25415     | 88.89035       | Urban  |
| 15 | Shannan      | 29.24615     | 91.7657        | Urban  |
| 16 | NCO-P        | 27.95        | 86.82          | Remote |

**Table 2. Monthly mean ( $\pm$ standard deviation) O<sub>3</sub>S/O<sub>3</sub> at NCO-P, Nam Co, and Waliguan in southern, central and northern Tibetan Plateau, respectively in 2012**

| Month       | NCO-P             | Nam Co            | Waliguan          |
|-------------|-------------------|-------------------|-------------------|
| January     | 0.856 $\pm$ 0.105 | 0.849 $\pm$ 0.113 | 0.713 $\pm$ 0.057 |
| February    | 0.796 $\pm$ 0.088 | 0.819 $\pm$ 0.073 | 0.748 $\pm$ 0.062 |
| March       | 0.776 $\pm$ 0.147 | 0.801 $\pm$ 0.110 | 0.711 $\pm$ 0.069 |
| April       | 0.733 $\pm$ 0.062 | 0.689 $\pm$ 0.088 | 0.717 $\pm$ 0.072 |
| May         | 0.625 $\pm$ 0.142 | 0.627 $\pm$ 0.129 | 0.660 $\pm$ 0.069 |
| June        | 0.493 $\pm$ 0.161 | 0.545 $\pm$ 0.153 | 0.718 $\pm$ 0.082 |
| July        | 0.526 $\pm$ 0.089 | 0.508 $\pm$ 0.093 | 0.754 $\pm$ 0.100 |
| August      | 0.475 $\pm$ 0.087 | 0.487 $\pm$ 0.101 | 0.579 $\pm$ 0.072 |
| September   | 0.381 $\pm$ 0.067 | 0.349 $\pm$ 0.084 | 0.571 $\pm$ 0.108 |
| October     | 0.542 $\pm$ 0.133 | 0.563 $\pm$ 0.099 | 0.601 $\pm$ 0.078 |
| November    | 0.717 $\pm$ 0.099 | 0.729 $\pm$ 0.061 | 0.716 $\pm$ 0.066 |
| December    | 0.708 $\pm$ 0.089 | 0.747 $\pm$ 0.049 | 0.736 $\pm$ 0.050 |
| Mean (2012) | 0.635 $\pm$ 0.181 | 0.643 $\pm$ 0.179 | 0.685 $\pm$ 0.098 |
